# Supplementary material for: Multi-Geometry Parameters Optimization of Large-Area Roll-to-Roll Nanoimprint Module Using Grey Relational Analysis and Artificial Neural Network
Source: MDPI journal article supplement (doi:10.3390/polym15132909), 2023-06-30
Supplement: s1 [file s1]

**Table S1.** Material properties

| Material                                       | Property                  | Value   |
|------------------------------------------------|---------------------------|---------|
| Steel                                          | Young's modulus (MPa)     | 200,000 |
|                                                | Poisson's ratio           | 0.3     |
| Rubber (room-temperature-vulcanizing silicone) | Hardness (Shore A)        | 75      |
|                                                | Young's modulus (MPa)     | 7.05    |
|                                                | Poisson's ratio of rubber | 0.49    |

**Table S2.** Parameters of FEM models comparison

| Model                                         | Nodes     | Elements  | Computing time (s) |
|-----------------------------------------------|-----------|-----------|--------------------|
| Full model (Model a)                          | 7,328,300 | 5,061,504 | 12600              |
| Model with simplified master roller (Model b) | 3,166,304 | 2,094,864 | 5580               |
| Model with symmetric condition (Model c)      | 791,576   | 523,716   | 3694               |

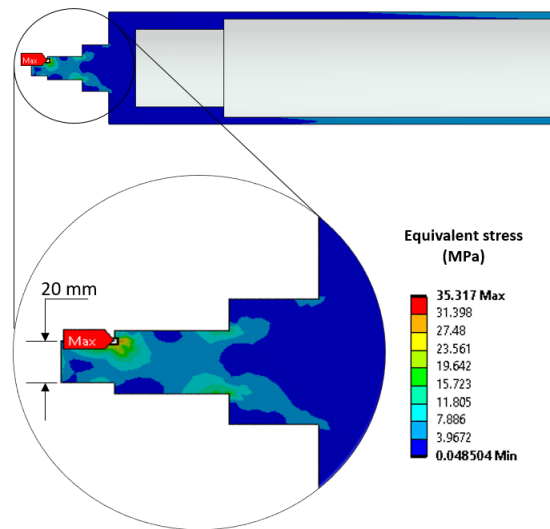**Figure S1.** Stress concentration was shown on the cross section at the both ends of roller when using 20 mm axis diameter with average applied force  $f = 3 \text{ N/mm}$  on the rubber roller length  $L = 1200 \text{ mm}$  and  $D = 160 \text{ mm}$ **Table S3.** Non-uniformity versus various axis diameter with average applied force  $f = 3 \text{ N/mm}$  on the rubber roller length  $L = 1200 \text{ mm}$  and  $D = 160 \text{ mm}$ 

| Axis diameter (mm) | Non-uniformity U (%) |
|--------------------|----------------------|
| 20                 | 11.5250              |
| 30                 | 11.1702              |
| 40                 | 10.6297              |
| 50                 | 9.9125               |
| 60                 | 9.1358               |

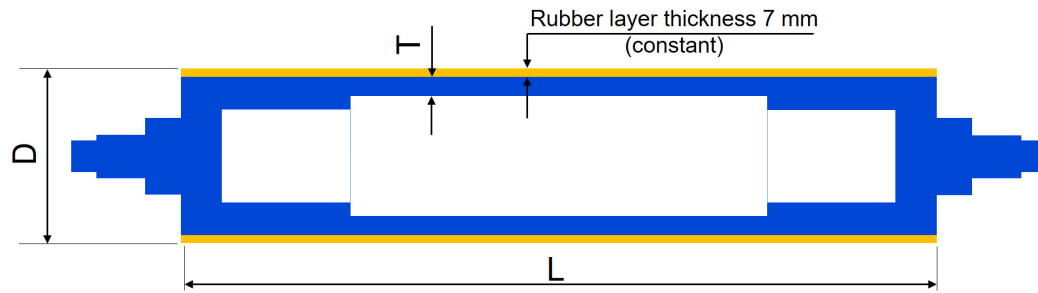

**Figure S2.** Geometry parameters of rubber roller from the cross section view

**Table S4.** L9 orthogonal array with factor levels and results.

| No. | Rubber roller diameter D | Rubber roller thickness T | Rubber roller length L | Non-Uniformity U (%) |
|-----|--------------------------|---------------------------|------------------------|----------------------|
| #1  | 1                        | 1                         | 1                      | 4.6702               |
| #2  | 1                        | 2                         | 2                      | 16.7003              |
| #3  | 1                        | 3                         | 3                      | 45.996               |
| #4  | 2                        | 1                         | 2                      | 11.1702              |
| #5  | 2                        | 2                         | 3                      | 27.3834              |
| #6  | 2                        | 3                         | 1                      | 2.0948               |
| #7  | 3                        | 1                         | 3                      | 21.175               |
| #8  | 3                        | 2                         | 1                      | 2.0479               |
| #9  | 3                        | 3                         | 2                      | 4.6652               |

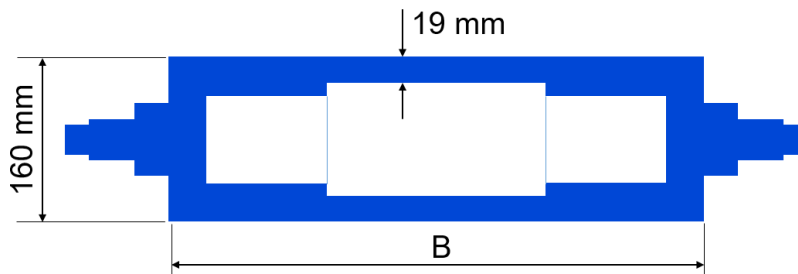

**Figure S3.** Geometry parameters of backup roller from the cross section view

**Table S5.** Non-uniformity simulation results of full factorial design of experiments

| # | Rubber roller length L (mm) | Backup roller length B (mm) | Force ratio R | Non-uniformity U (%) |
|---|-----------------------------|-----------------------------|---------------|----------------------|
| 1 | 1200                        | 200                         | 1             | 3.243                |
| 2 | 1200                        | 200                         | 3             | 1.1567               |
| 3 | 1200                        | 200                         | 5             | 2.2205               |
| 4 | 1200                        | 200                         | 7             | 2.7811               |
| 5 | 1200                        | 200                         | 9             | 3.1158               |
| 6 | 1200                        | 400                         | 1             | 3.2806               |
| 7 | 1200                        | 400                         | 3             | 1.0237               |

| #  | Rubber roller length L<br>(mm) | Backup roller length B<br>(mm) | Force ratio R | Non-uniformity U<br>(%) |
|----|--------------------------------|--------------------------------|---------------|-------------------------|
| 8  | 1200                           | 400                            | 5             | 1.7829                  |
| 9  | 1200                           | 400                            | 7             | 2.2811                  |
| 10 | 1200                           | 400                            | 9             | 2.5813                  |
| 11 | 1200                           | 600                            | 1             | 3.3897                  |
| 12 | 1200                           | 600                            | 3             | 1.1485                  |
| 13 | 1200                           | 600                            | 5             | 1.2262                  |
| 14 | 1200                           | 600                            | 7             | 1.6837                  |
| 15 | 1200                           | 600                            | 9             | 1.9554                  |
| 16 | 1200                           | 800                            | 1             | 3.7794                  |
| 17 | 1200                           | 800                            | 3             | 1.5031                  |
| 18 | 1200                           | 800                            | 5             | 1.0039                  |
| 19 | 1200                           | 800                            | 7             | 1.0741                  |
| 20 | 1200                           | 800                            | 9             | 1.1909                  |
| 21 | 1200                           | 1000                           | 1             | 4.2369                  |
| 22 | 1200                           | 1000                           | 3             | 2.0865                  |
| 23 | 1200                           | 1000                           | 5             | 1.4699                  |
| 24 | 1200                           | 1000                           | 7             | 1.2231                  |
| 25 | 1200                           | 1000                           | 9             | 1.1041                  |
| 26 | 1400                           | 200                            | 1             | 5.386                   |
| 27 | 1400                           | 200                            | 3             | 2.2132                  |
| 28 | 1400                           | 200                            | 5             | 3.879                   |
| 29 | 1400                           | 200                            | 7             | 4.9513                  |
| 30 | 1400                           | 200                            | 9             | 5.5926                  |
| 31 | 1400                           | 400                            | 1             | 5.3377                  |
| 32 | 1400                           | 400                            | 3             | 1.9528                  |
| 33 | 1400                           | 400                            | 5             | 3.1413                  |
| 34 | 1400                           | 400                            | 7             | 4.1155                  |
| 35 | 1400                           | 400                            | 9             | 4.7088                  |
| 36 | 1400                           | 600                            | 1             | 5.55                    |
| 37 | 1400                           | 600                            | 3             | 1.6143                  |
| 38 | 1400                           | 600                            | 5             | 2.5096                  |
| 39 | 1400                           | 600                            | 7             | 3.1767                  |
| 40 | 1400                           | 600                            | 9             | 3.7114                  |
| 41 | 1400                           | 800                            | 1             | 6.0419                  |
| 42 | 1400                           | 800                            | 3             | 1.3464                  |
| 43 | 1400                           | 800                            | 5             | 1.972                   |
| 44 | 1400                           | 800                            | 7             | 2.3924                  |
| 45 | 1400                           | 800                            | 9             | 2.6403                  |
| 46 | 1400                           | 1000                           | 1             | 6.711                   |
| 47 | 1400                           | 1000                           | 3             | 2.3205                  |
| 48 | 1400                           | 1000                           | 5             | 1.337                   |
| 49 | 1400                           | 1000                           | 7             | 1.7105                  |
| 50 | 1400                           | 1000                           | 9             | 1.9327                  |
| 51 | 1600                           | 200                            | 1             | 8.3297                  |
| 52 | 1600                           | 200                            | 3             | 3.0437                  |
| 53 | 1600                           | 200                            | 5             | 6.6049                  |

| #  | Rubber roller length L<br>(mm) | Backup roller length B<br>(mm) | Force ratio R | Non-uniformity U<br>(%) |
|----|--------------------------------|--------------------------------|---------------|-------------------------|
| 54 | 1600                           | 200                            | 7             | 8.4514                  |
| 55 | 1600                           | 200                            | 9             | 9.5907                  |
| 56 | 1600                           | 400                            | 1             | 8.0975                  |
| 57 | 1600                           | 400                            | 3             | 2.6938                  |
| 58 | 1600                           | 400                            | 5             | 4.2506                  |
| 59 | 1600                           | 400                            | 7             | 7.2452                  |
| 60 | 1600                           | 400                            | 9             | 8.2466                  |
| 61 | 1600                           | 600                            | 1             | 8.2817                  |
| 62 | 1600                           | 600                            | 3             | 2.1526                  |
| 63 | 1600                           | 600                            | 5             | 4.3782                  |
| 64 | 1600                           | 600                            | 7             | 5.9203                  |
| 65 | 1600                           | 600                            | 9             | 6.864                   |
| 66 | 1600                           | 800                            | 1             | 8.8241                  |
| 67 | 1600                           | 800                            | 3             | 2.7132                  |
| 68 | 1600                           | 800                            | 5             | 3.0095                  |
| 69 | 1600                           | 800                            | 7             | 4.3916                  |
| 70 | 1600                           | 800                            | 9             | 5.2515                  |
| 71 | 1600                           | 1000                           | 1             | 9.7198                  |
| 72 | 1600                           | 1000                           | 3             | 3.5585                  |
| 73 | 1600                           | 1000                           | 5             | 2.3486                  |
| 74 | 1600                           | 1000                           | 7             | 2.7167                  |
| 75 | 1600                           | 1000                           | 9             | 3.5244                  |
| 76 | 1800                           | 200                            | 1             | 12.1742                 |
| 77 | 1800                           | 200                            | 3             | 5.159                   |
| 78 | 1800                           | 200                            | 5             | 10.7993                 |
| 79 | 1800                           | 200                            | 7             | 13.6539                 |
| 80 | 1800                           | 200                            | 9             | 15.3178                 |
| 81 | 1800                           | 400                            | 1             | 11.8404                 |
| 82 | 1800                           | 400                            | 3             | 4.2665                  |
| 83 | 1800                           | 400                            | 5             | 9.4275                  |
| 84 | 1800                           | 400                            | 7             | 12.0924                 |
| 85 | 1800                           | 400                            | 9             | 13.6764                 |
| 86 | 1800                           | 600                            | 1             | 11.9996                 |
| 87 | 1800                           | 600                            | 3             | 3.1865                  |
| 88 | 1800                           | 600                            | 5             | 7.8623                  |
| 89 | 1800                           | 600                            | 7             | 10.3419                 |
| 90 | 1800                           | 600                            | 9             | 11.8439                 |
| 91 | 1800                           | 800                            | 1             | 12.4608                 |
| 92 | 1800                           | 800                            | 3             | 2.1355                  |
| 93 | 1800                           | 800                            | 5             | 6.0213                  |
| 94 | 1800                           | 800                            | 7             | 8.3207                  |
| 95 | 1800                           | 800                            | 9             | 9.7178                  |
| 96 | 1800                           | 1000                           | 1             | 13.6866                 |
| 97 | 1800                           | 1000                           | 3             | 1.5054                  |
| 98 | 1800                           | 1000                           | 5             | 4.016                   |
| 99 | 1800                           | 1000                           | 7             | 6.0297                  |

| #   | Rubber roller length L<br>(mm) | Backup roller length B<br>(mm) | Force ratio R | Non-uniformity U<br>(%) |
|-----|--------------------------------|--------------------------------|---------------|-------------------------|
| 100 | 1800                           | 1000                           | 9             | 7.3281                  |
| 101 | 2000                           | 200                            | 1             | 18.0742                 |
| 102 | 2000                           | 200                            | 3             | 7.7704                  |
| 103 | 2000                           | 200                            | 5             | 15.8905                 |
| 104 | 2000                           | 200                            | 7             | 19.825                  |
| 105 | 2000                           | 200                            | 9             | 22.1766                 |
| 106 | 2000                           | 400                            | 1             | 17.4394                 |
| 107 | 2000                           | 400                            | 3             | 6.5714                  |
| 108 | 2000                           | 400                            | 5             | 14.1571                 |
| 109 | 2000                           | 400                            | 7             | 18.0047                 |
| 110 | 2000                           | 400                            | 9             | 20.1933                 |
| 111 | 2000                           | 600                            | 1             | 17.519                  |
| 112 | 2000                           | 600                            | 3             | 5.1093                  |
| 113 | 2000                           | 600                            | 5             | 12.1712                 |
| 114 | 2000                           | 600                            | 7             | 15.8748                 |
| 115 | 2000                           | 600                            | 9             | 18.0626                 |
| 116 | 2000                           | 800                            | 1             | 18.0836                 |
| 117 | 2000                           | 800                            | 3             | 3.7569                  |
| 118 | 2000                           | 800                            | 5             | 9.8848                  |
| 119 | 2000                           | 800                            | 7             | 13.3307                 |
| 120 | 2000                           | 800                            | 9             | 15.4368                 |
| 121 | 2000                           | 1000                           | 1             | 19.3908                 |
| 122 | 2000                           | 1000                           | 3             | 2.1807                  |
| 123 | 2000                           | 1000                           | 5             | 7.3055                  |
| 124 | 2000                           | 1000                           | 7             | 10.4359                 |
| 125 | 2000                           | 1000                           | 9             | 12.4108                 |

**Table S6.** Distributed curve results of full factorial design of experiment

| #  | Average applied force f<br>(N/mm) | Rubber roller<br>length L<br>(mm) | Backup roller<br>length B<br>(mm) | Force<br>ratio<br>R | A<br>( $\times 10^{-7}$ ) | C      |
|----|-----------------------------------|-----------------------------------|-----------------------------------|---------------------|---------------------------|--------|
| 1  | 1                                 | 1200                              | 200                               | 1                   | 0.7310                    | 1.0042 |
| 2  | 1                                 | 1200                              | 200                               | 5                   | -0.3430                   | 1.0228 |
| 3  | 1                                 | 1200                              | 200                               | 9                   | -0.5680                   | 1.0266 |
| 4  | 1                                 | 1200                              | 600                               | 1                   | 0.8590                    | 1.0018 |
| 5  | 1                                 | 1200                              | 600                               | 5                   | -0.1140                   | 1.0181 |
| 6  | 1                                 | 1200                              | 600                               | 9                   | -0.3080                   | 1.0213 |
| 7  | 1                                 | 1200                              | 1000                              | 1                   | 1.0880                    | 0.9979 |
| 8  | 1                                 | 1200                              | 1000                              | 5                   | 0.2850                    | 1.0114 |
| 9  | 1                                 | 1200                              | 1000                              | 9                   | 0.1210                    | 1.0142 |
| 10 | 1                                 | 1600                              | 200                               | 1                   | 1.0190                    | 0.9869 |
| 11 | 1                                 | 1600                              | 200                               | 5                   | -1.0160                   | 1.0426 |
| 12 | 1                                 | 1600                              | 200                               | 9                   | -1.4520                   | 1.0544 |
| 13 | 1                                 | 1600                              | 600                               | 1                   | 1.1360                    | 0.9833 |
| 14 | 1                                 | 1600                              | 600                               | 5                   | -0.6820                   | 1.0327 |
| 15 | 1                                 | 1600                              | 600                               | 9                   | -1.0430                   | 1.0425 |

| #  | Average applied force f<br>(N/mm) | Rubber roller<br>length L<br>(mm) | Backup roller<br>length B<br>(mm) | Force<br>ratio<br>R | A<br>( $\times 10^{-7}$ ) | C      |
|----|-----------------------------------|-----------------------------------|-----------------------------------|---------------------|---------------------------|--------|
| 16 | 1                                 | 1600                              | 1000                              | 1                   | 1.4120                    | 0.9758 |
| 17 | 1                                 | 1600                              | 1000                              | 5                   | -0.2160                   | 1.0204 |
| 18 | 1                                 | 1600                              | 1000                              | 9                   | -0.5440                   | 1.0292 |
| 19 | 1                                 | 2000                              | 200                               | 1                   | 1.4160                    | 0.9562 |
| 20 | 1                                 | 2000                              | 200                               | 5                   | -1.7330                   | 1.0831 |
| 21 | 1                                 | 2000                              | 200                               | 9                   | -2.3890                   | 1.1093 |
| 22 | 1                                 | 2000                              | 600                               | 1                   | 1.4750                    | 0.9533 |
| 23 | 1                                 | 2000                              | 600                               | 5                   | -1.2950                   | 1.0652 |
| 24 | 1                                 | 2000                              | 600                               | 9                   | -1.8720                   | 1.0881 |
| 25 | 1                                 | 2000                              | 1000                              | 1                   | 1.7590                    | 0.9420 |
| 26 | 1                                 | 2000                              | 1000                              | 5                   | -0.8090                   | 1.0459 |
| 27 | 1                                 | 2000                              | 1000                              | 9                   | -1.3200                   | 1.0663 |
| 28 | 3                                 | 1200                              | 200                               | 1                   | 3.6750                    | 2.9683 |
| 29 | 3                                 | 1200                              | 200                               | 5                   | -1.9800                   | 3.0643 |
| 30 | 3                                 | 1200                              | 200                               | 9                   | -3.1880                   | 3.0847 |
| 31 | 3                                 | 1200                              | 600                               | 1                   | 3.8780                    | 2.9614 |
| 32 | 3                                 | 1200                              | 600                               | 5                   | -0.7230                   | 3.0401 |
| 33 | 3                                 | 1200                              | 600                               | 9                   | -1.6950                   | 3.0565 |
| 34 | 3                                 | 1200                              | 1000                              | 1                   | 5.0020                    | 2.9428 |
| 35 | 3                                 | 1200                              | 1000                              | 5                   | 1.1760                    | 3.0069 |
| 36 | 3                                 | 1200                              | 1000                              | 9                   | 0.4520                    | 3.0197 |
| 37 | 3                                 | 1600                              | 200                               | 1                   | 5.3420                    | 2.8796 |
| 38 | 3                                 | 1600                              | 200                               | 5                   | -5.3790                   | 3.1716 |
| 39 | 3                                 | 1600                              | 200                               | 9                   | -7.6650                   | 3.2336 |
| 40 | 3                                 | 1600                              | 600                               | 1                   | 5.4580                    | 2.8742 |
| 41 | 3                                 | 1600                              | 600                               | 5                   | -3.4880                   | 3.1194 |
| 42 | 3                                 | 1600                              | 600                               | 9                   | -5.4280                   | 3.1721 |
| 43 | 3                                 | 1600                              | 1000                              | 1                   | 6.6180                    | 2.8427 |
| 44 | 3                                 | 1600                              | 1000                              | 5                   | -1.0520                   | 3.0530 |
| 45 | 3                                 | 1600                              | 1000                              | 9                   | -2.6530                   | 3.0967 |
| 46 | 3                                 | 2000                              | 200                               | 1                   | 7.1730                    | 2.7303 |
| 47 | 3                                 | 2000                              | 200                               | 5                   | -8.8870                   | 3.3777 |
| 48 | 3                                 | 2000                              | 200                               | 9                   | -12.2980                  | 3.5132 |
| 49 | 3                                 | 2000                              | 600                               | 1                   | 7.1420                    | 2.7312 |
| 50 | 3                                 | 2000                              | 600                               | 5                   | -6.7190                   | 3.2920 |
| 51 | 3                                 | 2000                              | 600                               | 9                   | -9.7290                   | 3.4124 |
| 52 | 3                                 | 2000                              | 1000                              | 1                   | 8.2060                    | 2.6889 |
| 53 | 3                                 | 2000                              | 1000                              | 5                   | -3.9330                   | 3.1815 |
| 54 | 3                                 | 2000                              | 1000                              | 9                   | -6.5140                   | 3.2856 |
| 55 | 5                                 | 1200                              | 200                               | 1                   | 8.6700                    | 4.9442 |
| 56 | 5                                 | 1200                              | 200                               | 5                   | -4.2100                   | 5.1582 |
| 57 | 5                                 | 1200                              | 200                               | 9                   | -6.8500                   | 5.2018 |
| 58 | 5                                 | 1200                              | 600                               | 1                   | 8.9600                    | 4.9322 |
| 59 | 5                                 | 1200                              | 600                               | 5                   | -1.5500                   | 5.1116 |
| 60 | 5                                 | 1200                              | 600                               | 9                   | -3.8400                   | 5.1504 |

| #   | Average applied force f<br>(N/mm) | Rubber roller<br>length L<br>(mm) | Backup roller<br>length B<br>(mm) | Force<br>ratio<br>R | A<br>( $\times 10^{-7}$ ) | C      |
|-----|-----------------------------------|-----------------------------------|-----------------------------------|---------------------|---------------------------|--------|
| 61  | 5                                 | 1200                              | 1000                              | 1                   | 11.4000                   | 4.8910 |
| 62  | 5                                 | 1200                              | 1000                              | 5                   | 2.8600                    | 5.0346 |
| 63  | 5                                 | 1200                              | 1000                              | 9                   | 1.1500                    | 5.0641 |
| 64  | 5                                 | 1600                              | 200                               | 1                   | 12.0000                   | 4.7488 |
| 65  | 5                                 | 1600                              | 200                               | 5                   | -11.6000                  | 5.3899 |
| 66  | 5                                 | 1600                              | 200                               | 9                   | -16.7000                  | 5.5247 |
| 67  | 5                                 | 1600                              | 600                               | 1                   | 12.3000                   | 4.7378 |
| 68  | 5                                 | 1600                              | 600                               | 5                   | -7.9900                   | 5.2926 |
| 69  | 5                                 | 1600                              | 600                               | 9                   | -12.3000                  | 5.4093 |
| 70  | 5                                 | 1600                              | 1000                              | 1                   | 15.0000                   | 4.6662 |
| 71  | 5                                 | 1600                              | 1000                              | 5                   | -2.3300                   | 5.1391 |
| 72  | 5                                 | 1600                              | 1000                              | 9                   | -5.9600                   | 5.2385 |
| 73  | 5                                 | 2000                              | 200                               | 1                   | 15.4000                   | 4.4410 |
| 74  | 5                                 | 2000                              | 200                               | 5                   | -19.7000                  | 5.8530 |
| 75  | 5                                 | 2000                              | 200                               | 9                   | -27.2000                  | 6.1517 |
| 76  | 5                                 | 2000                              | 600                               | 1                   | 15.5000                   | 4.4399 |
| 77  | 5                                 | 2000                              | 600                               | 5                   | -14.6000                  | 5.6526 |
| 78  | 5                                 | 2000                              | 600                               | 9                   | -20.3000                  | 5.8798 |
| 79  | 5                                 | 2000                              | 1000                              | 1                   | 17.8000                   | 4.3444 |
| 80  | 5                                 | 2000                              | 1000                              | 5                   | -8.5900                   | 5.4182 |
| 81  | 5                                 | 2000                              | 1000                              | 9                   | -14.1000                  | 5.6396 |
| 82  | 7                                 | 1200                              | 200                               | 1                   | 13.6790                   | 6.8771 |
| 83  | 7                                 | 1200                              | 200                               | 5                   | -7.1940                   | 7.2363 |
| 84  | 7                                 | 1200                              | 200                               | 9                   | -11.7720                  | 7.3153 |
| 85  | 7                                 | 1200                              | 600                               | 1                   | 14.9750                   | 6.8452 |
| 86  | 7                                 | 1200                              | 600                               | 5                   | -2.4580                   | 7.1470 |
| 87  | 7                                 | 1200                              | 600                               | 9                   | -6.2390                   | 7.2113 |
| 88  | 7                                 | 1200                              | 1000                              | 1                   | 19.1450                   | 6.7763 |
| 89  | 7                                 | 1200                              | 1000                              | 5                   | 4.8540                    | 7.0148 |
| 90  | 7                                 | 1200                              | 1000                              | 9                   | 2.0370                    | 7.0639 |
| 91  | 7                                 | 1600                              | 200                               | 1                   | 19.8640                   | 6.5560 |
| 92  | 7                                 | 1600                              | 200                               | 5                   | -19.2900                  | 7.6169 |
| 93  | 7                                 | 1600                              | 200                               | 9                   | -27.5670                  | 7.8400 |
| 94  | 7                                 | 1600                              | 600                               | 1                   | 20.4150                   | 6.5297 |
| 95  | 7                                 | 1600                              | 600                               | 5                   | -13.0850                  | 7.4474 |
| 96  | 7                                 | 1600                              | 600                               | 9                   | -19.7340                  | 7.6238 |
| 97  | 7                                 | 1600                              | 1000                              | 1                   | 24.8140                   | 6.4098 |
| 98  | 7                                 | 1600                              | 1000                              | 5                   | -3.6900                   | 7.1891 |
| 99  | 7                                 | 1600                              | 1000                              | 9                   | -9.6450                   | 7.3533 |
| 100 | 7                                 | 2000                              | 200                               | 1                   | 25.3890                   | 6.0551 |
| 101 | 7                                 | 2000                              | 200                               | 5                   | -30.4990                  | 8.3011 |
| 102 | 7                                 | 2000                              | 200                               | 9                   | -42.2760                  | 8.7637 |
| 103 | 7                                 | 2000                              | 600                               | 1                   | 25.0740                   | 6.0597 |
| 104 | 7                                 | 2000                              | 600                               | 5                   | -22.9510                  | 7.9991 |
| 105 | 7                                 | 2000                              | 600                               | 9                   | -32.3430                  | 8.3695 |

| #   | Average applied force f<br>(N/mm) | Rubber roller<br>length L<br>(mm) | Backup roller<br>length B<br>(mm) | Force<br>ratio<br>R | A<br>( $\times 10^{-7}$ ) | C      |
|-----|-----------------------------------|-----------------------------------|-----------------------------------|---------------------|---------------------------|--------|
| 106 | 7                                 | 2000                              | 1000                              | 1                   | 29.1650                   | 5.8947 |
| 107 | 7                                 | 2000                              | 1000                              | 5                   | -13.8070                  | 7.6412 |
| 108 | 7                                 | 2000                              | 1000                              | 9                   | -22.6470                  | 7.9663 |

**Table S7.** Summary of ANN model parameters for distributed curve prediction

| Factor                   | Parameter                                   |
|--------------------------|---------------------------------------------|
| Model                    | Sequential model                            |
| Kernal initializer       | He_uniform                                  |
| Activation               | Relu                                        |
| Optimizer                | Adam                                        |
| Type of network          | Feed forward back propagation               |
| Loss function            | Mean Squared Error                          |
| Batch size               | 15                                          |
| Training rate            | 0.025 (constant)<br>0.025 (0.99 decay rate) |
| Number of epochs         | 1000                                        |
| Training data            | 81                                          |
| Validation data          | 27                                          |
| Number of input neurons  | 4                                           |
| Number of hidden neurons | 16, 32, 16                                  |
| Number of hidden layer   | 3                                           |
| Number of output neurons | 2                                           |

The parameters of ANN model used for distributed curve along the roller via coefficient A, C are described in Table S7. The dataset comprises 108 cases, which are divided into 75% training data (81 cases) and 25% testing data (27 cases) using `random_state = 42` this ensures that the dataset will be split in the same way every time the code is executed. The input features are scaled using the standard scaler from the `sklearn` preprocessing library. Additionally, the coefficient A of the curve equation is scaled by multiplying it by  $10^7$  because the magnitude of the data is too small, which can potentially cause issues in training and prediction accuracy. The scaler inverse transform will be used in the prediction step to return the values to the original scale. After examining many different numbers, the 15 batch sizes and 3 hidden layers were chosen with 16, 32, and 16 neurons for each hidden layer, respectively. Choosing an appropriate learning rate is also crucial in training ANNs, as an inappropriate learning rate can impact the convergence speed, training stability, and the quality of the trained model and it is set at 0.025 in this model



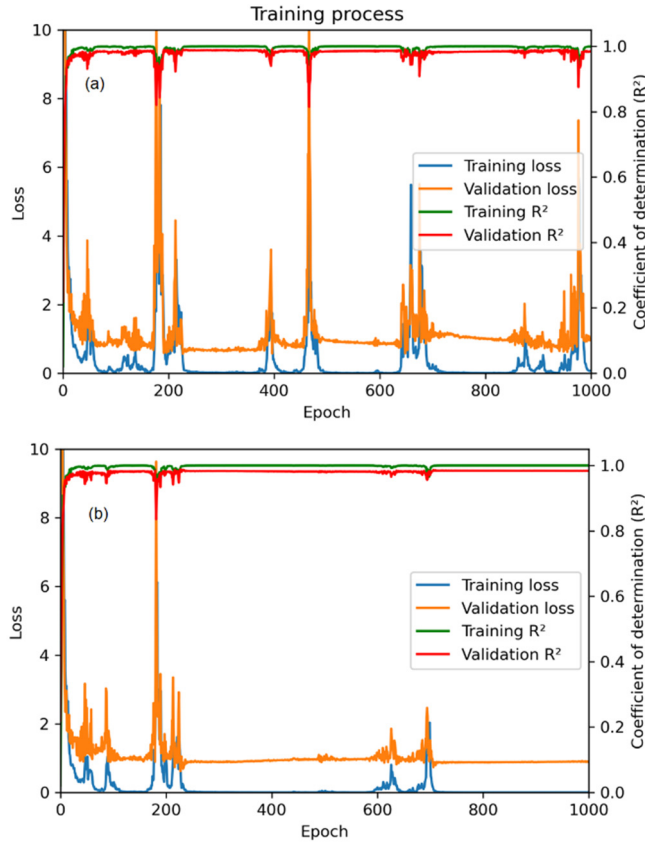

**Figure S4.** Training process of model with constant learning rate 0.025 (a) and learning rate 0.025 with exponential decay 0.99 (b)

Loss and coefficient of determination were used as the performance measurement of the two models. By using learning rate with exponential decay the model performs better with more stable in loss function during training process. The same goes for coefficient of determination ( $R^2$ ), both models have an  $R^2$  value close to 1 with a smoother curve when using learning rate with decay. The results indicate that the model can capture the variance in the target variable and has a good fit for the dataset.

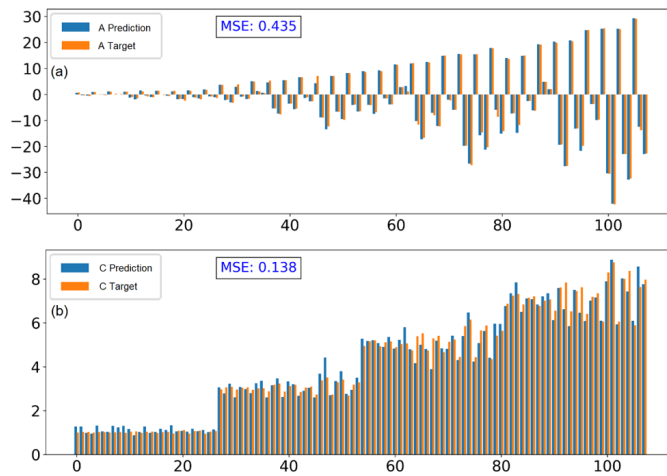

**Figure S5.** Comparison between prediction and target data of A (a) and C (b) for all cases with constant learning rate 0.025 model

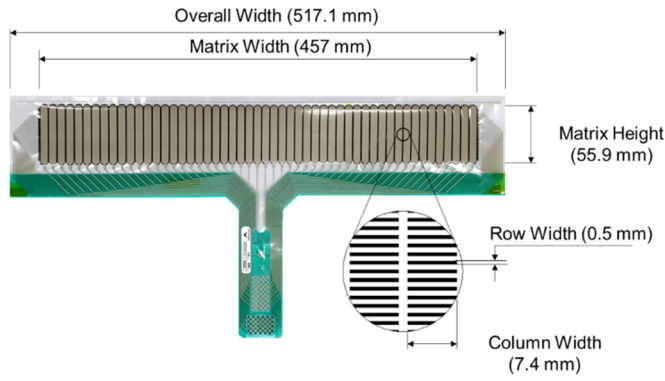

**Figure S6.** Pressure mapping thin-film arrays sensor parameters

### Appendix S1

The analysis of variance (ANOVA) for the Taguchi design of data in table 2 for GRG. The table can be obtained by calculated the **sum of square (SS)** of each parameter between groups

$$SS_{\text{each group}} = \sum n_i (x_i - \bar{x})^2$$

With  $n_i$  is the number of value in  $i^{\text{th}}$  group

$x_i$  is the mean of the  $i^{\text{th}}$  group

$\bar{x}$  is the overall mean

### Mean square

$$MS = \frac{SS}{df}$$

with  $df$  = number of group – 1

**Sum of square total ( $SS_{\text{total}}$ )** includes : sum of square deviations due to each geometry parameters and sum of square error ( $SS_{\text{error}}$  or error).

$$SS_{\text{total}} = \sum (x - \bar{x})^2$$

With  $\bar{x}$  is the overall mean,  $x$  is all individual observed value

### Sum of square error ( $SS_{\text{error}}$ or error)

$$SS_{\text{error}} (\text{error}) = SS_{\text{total}} - \sum SS_{\text{each group}}$$

### R-squared

$$R^2 = 1 - \frac{SS_{\text{error}}}{SS_{\text{total}}}$$

The contribution of each geometry parameter can be calculated by sum of square of each parameter in the total sum of square deviation

The ANOVA table can be simply obtained by statistical software. (In this study we obtained by Minitab software)
